# Supplementary figures and images for: circGLI3 Inhibits Oxidative Stress by Regulating the miR‐339‐5p/VEGFA Axis in IPEC‐J2 Cells
Source: Hindawi journal article supplement (doi:10.1155/2021/1086206), 2021-01-01

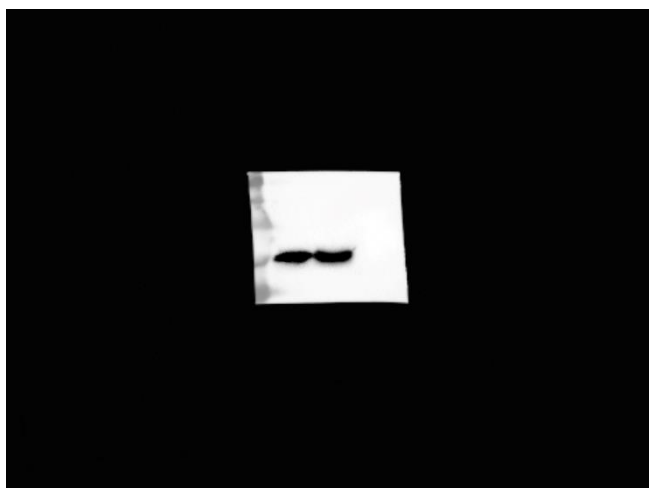

GAPDH (Figure 8C)

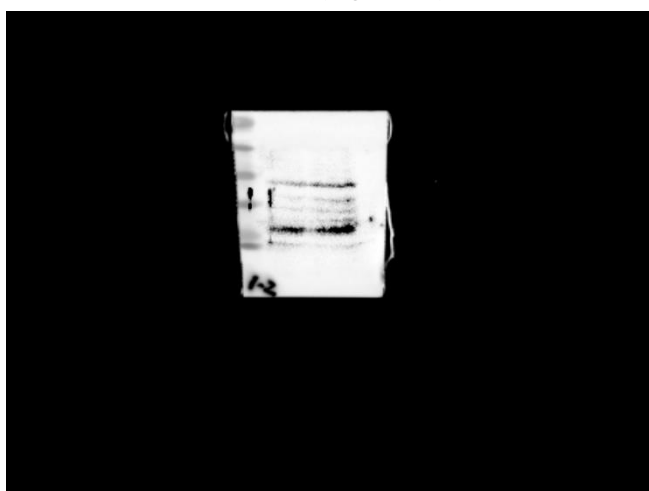

VEGFA (Figure 8C)

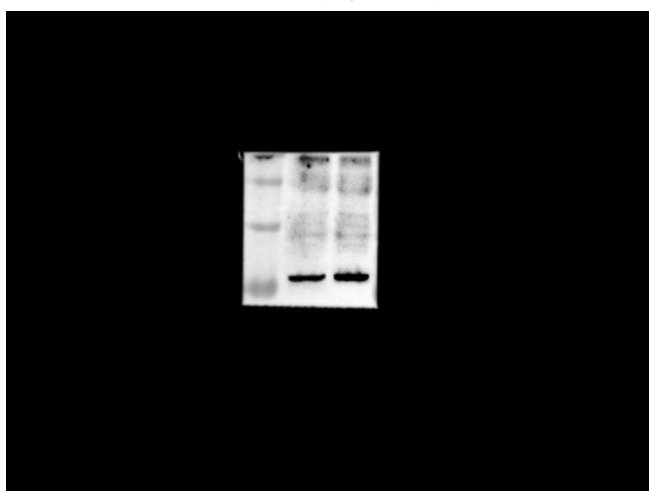

VEGFA (Figure 8C)

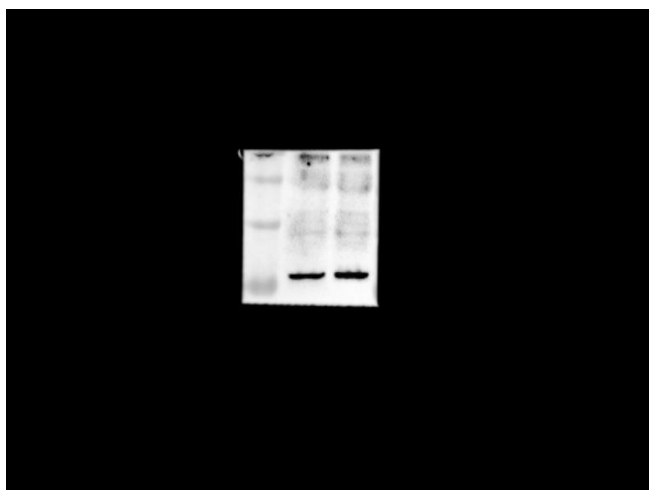

VEGFA (Figure 8C)

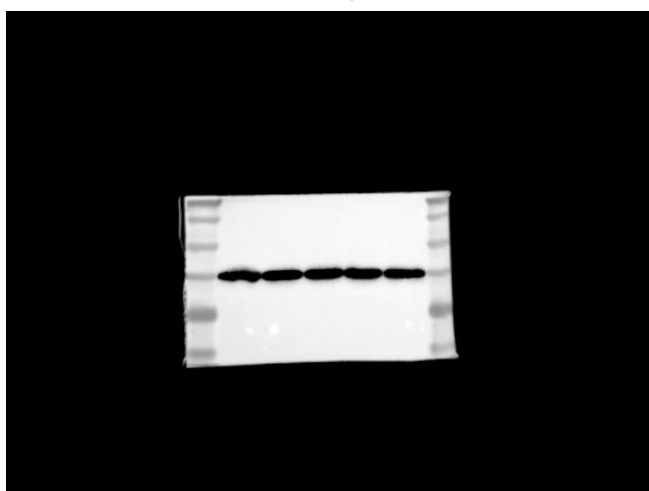

GAPDH (Figure 8D)

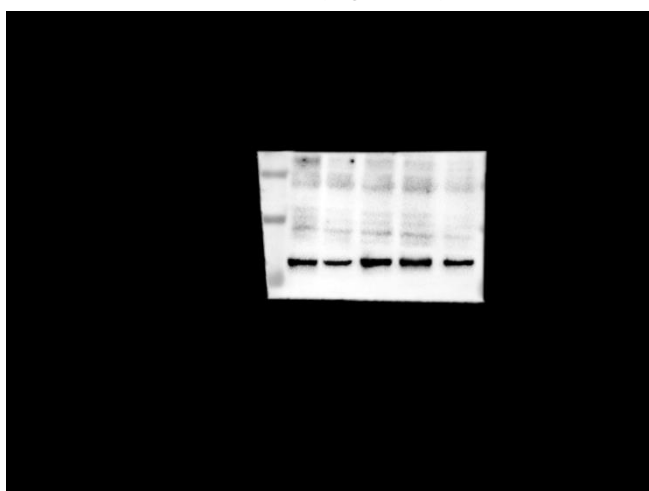

VEGFA (Figure 8D)

Supplement: f1 [file 1086206.f1.zip]

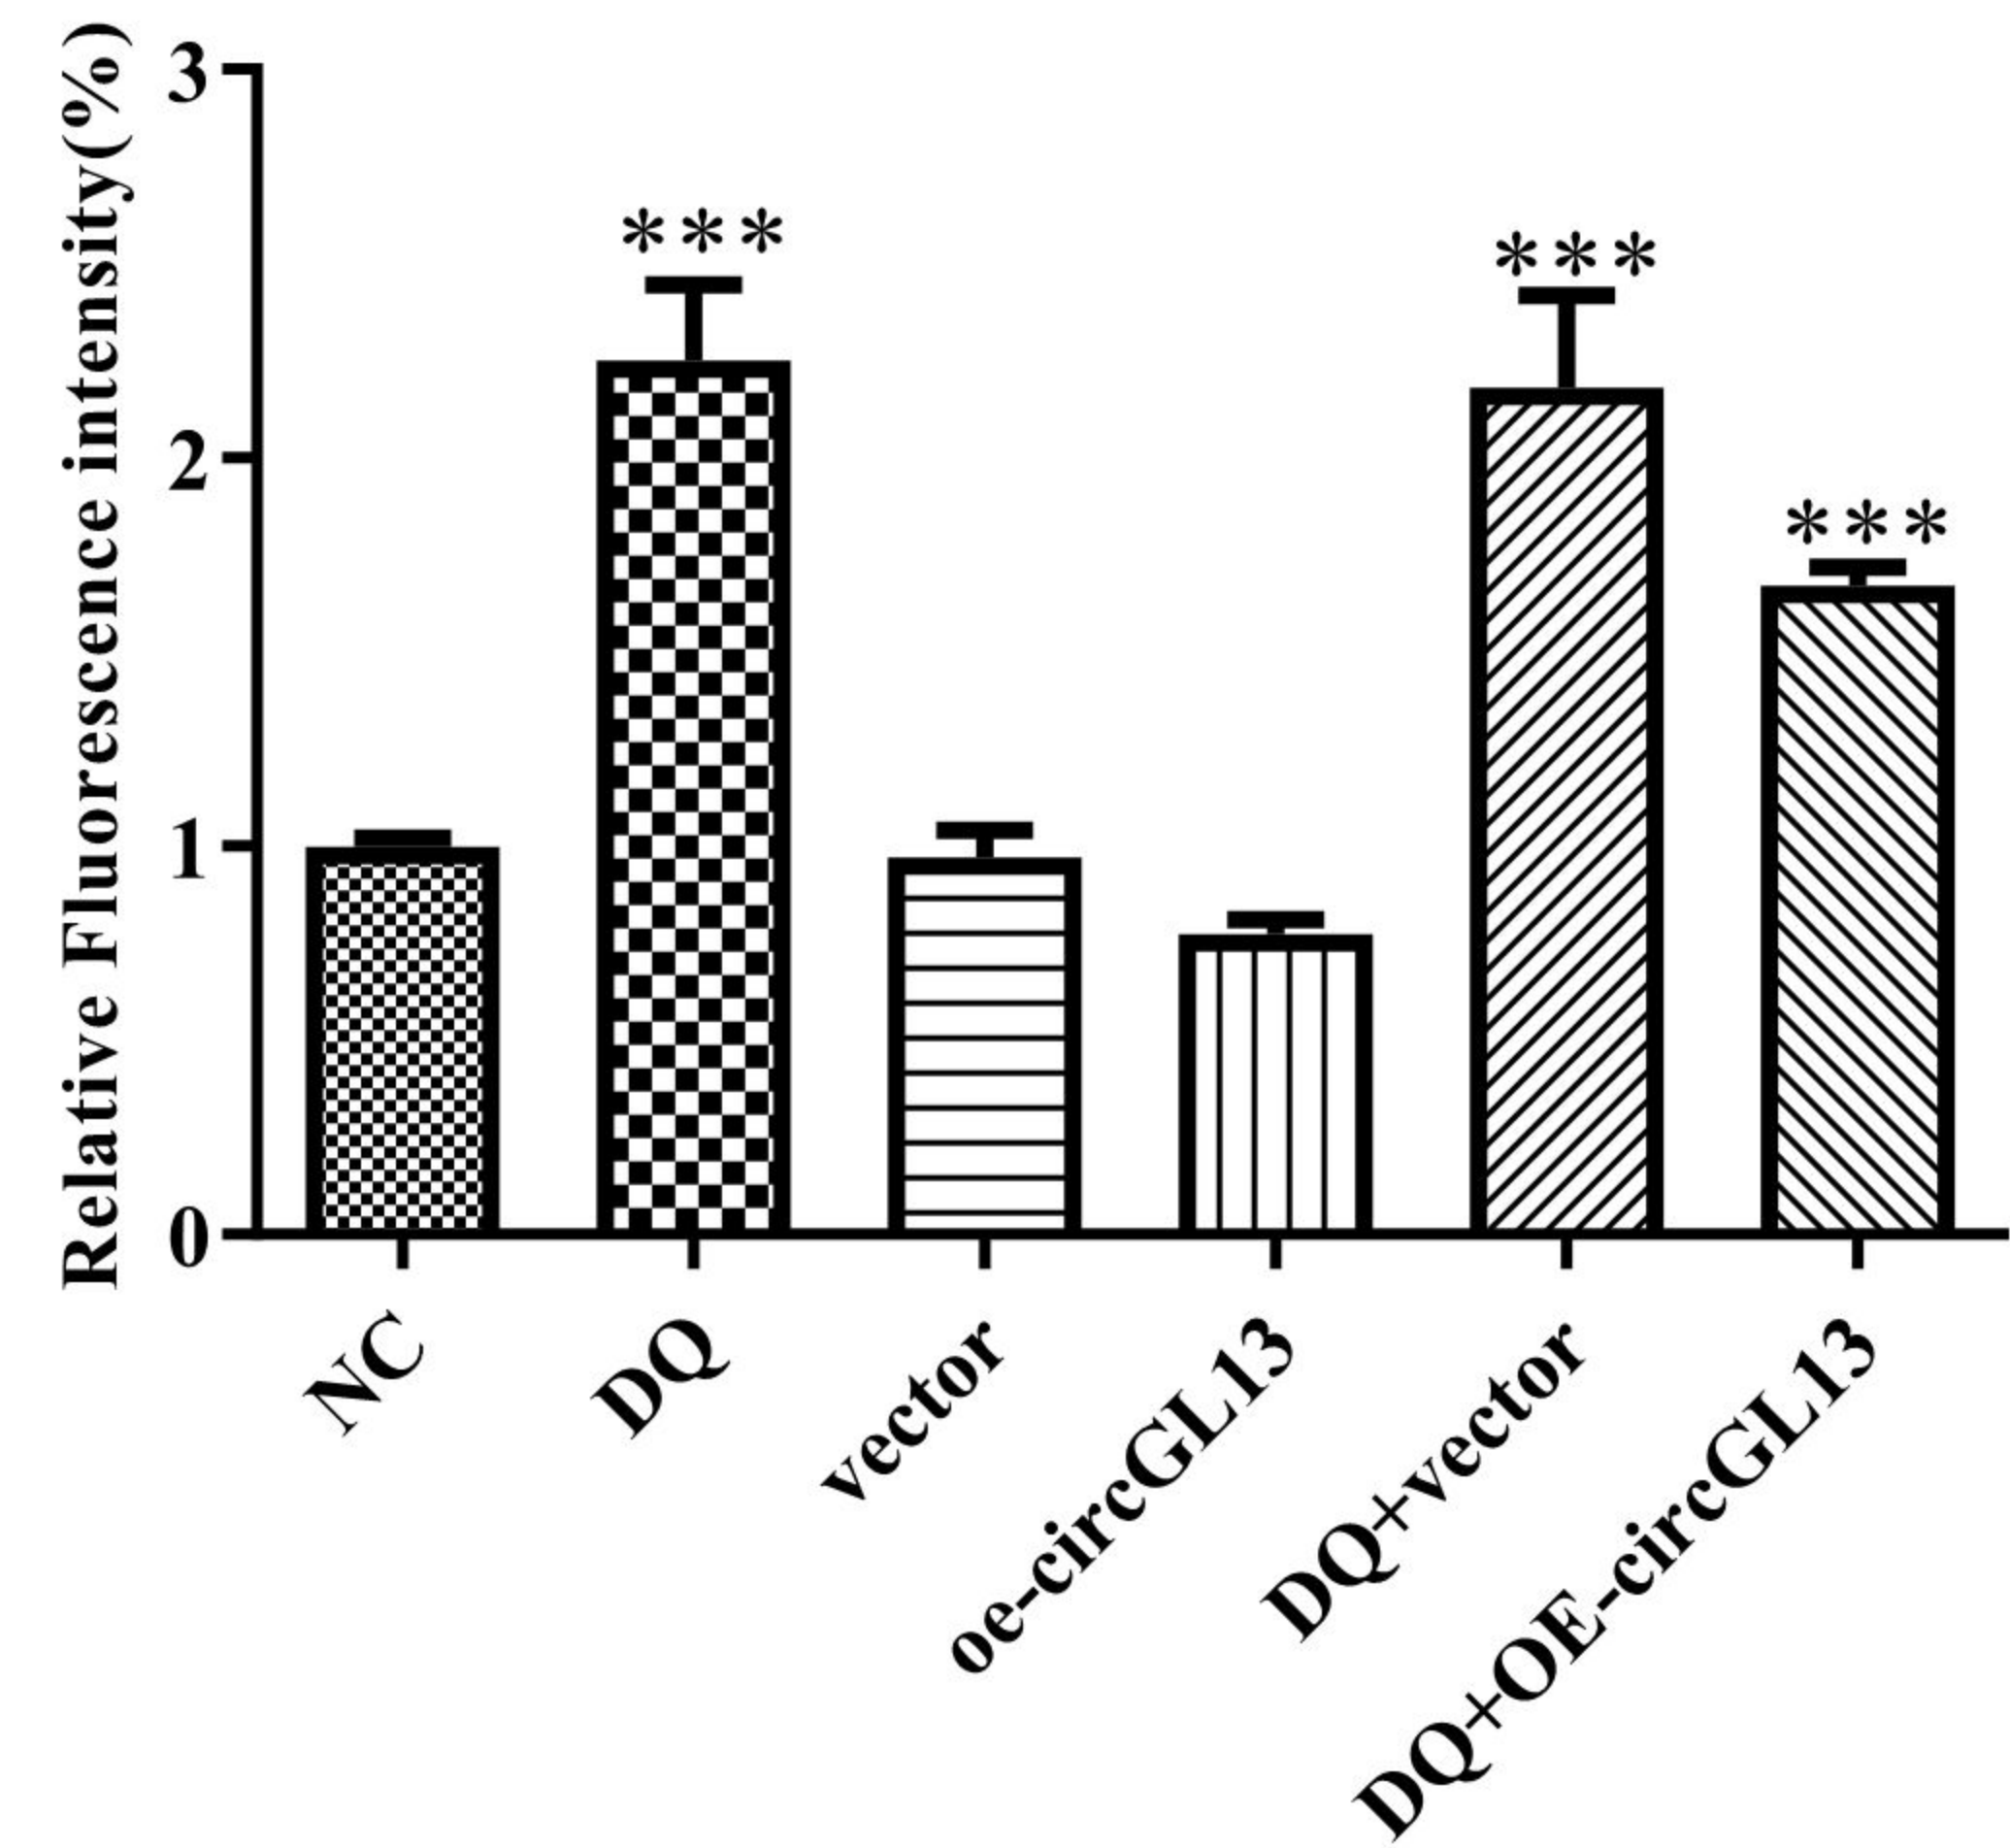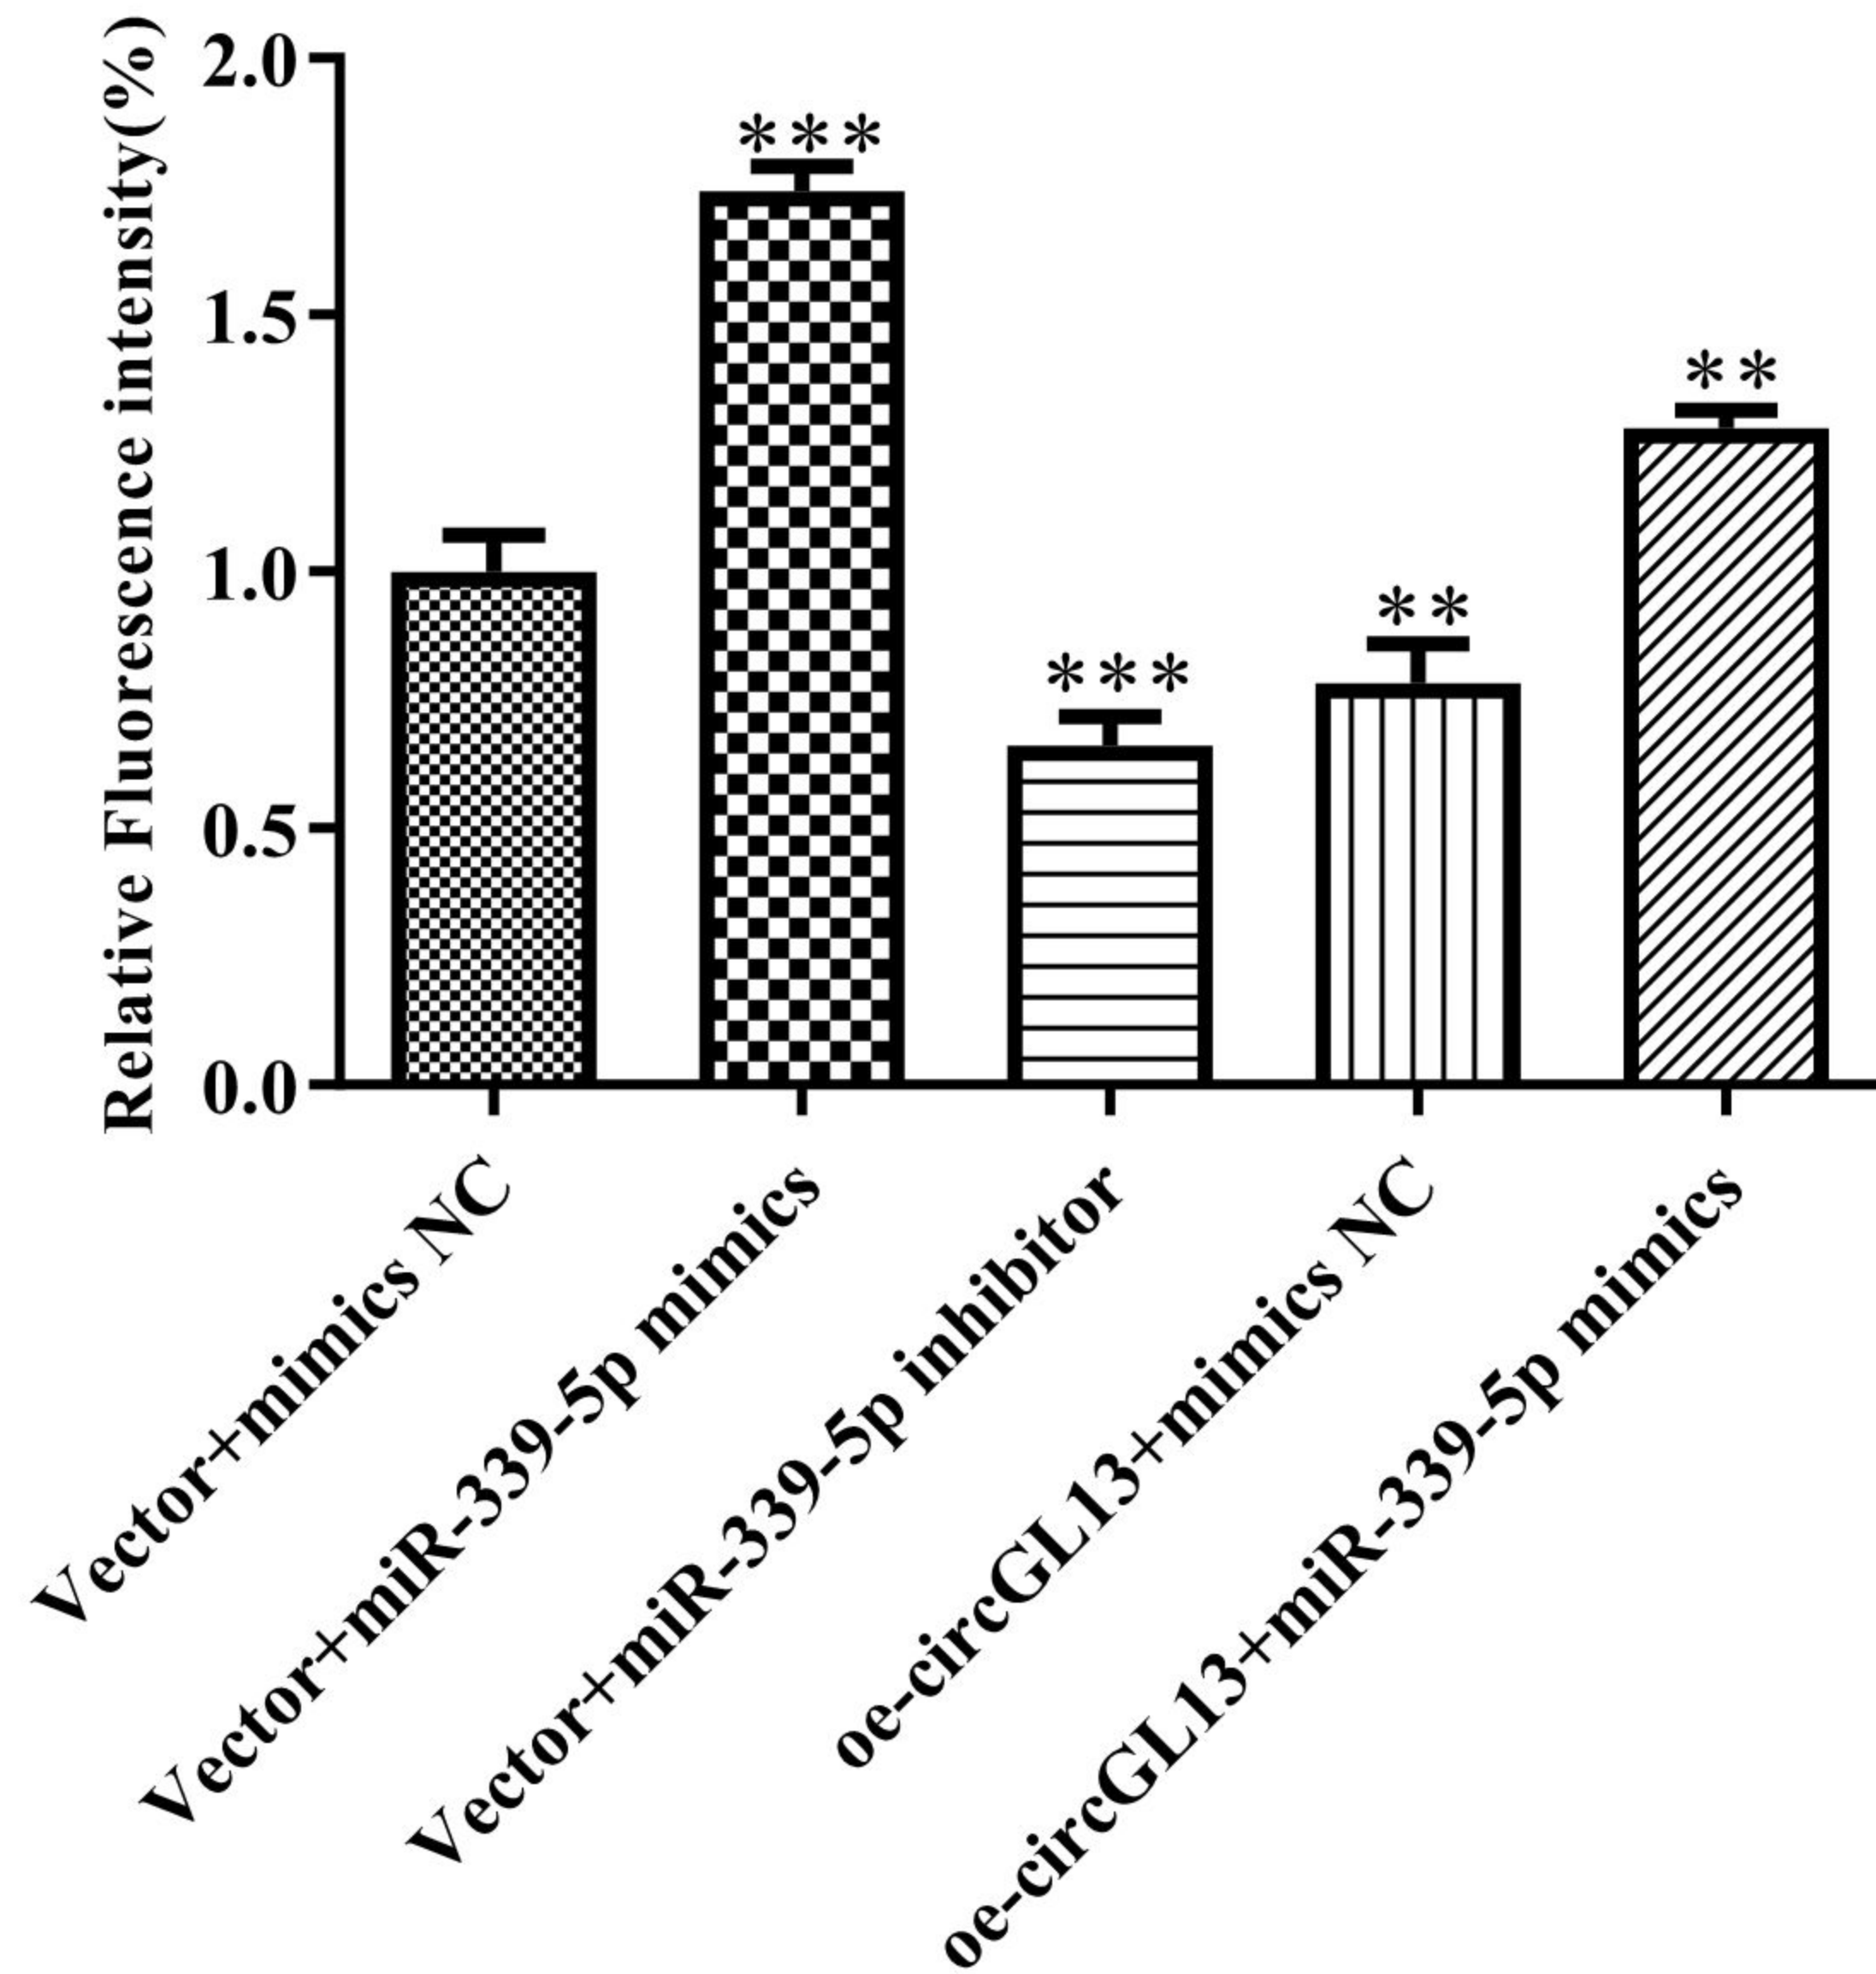

Supplement: f1 [file 1086206.f1.zip]

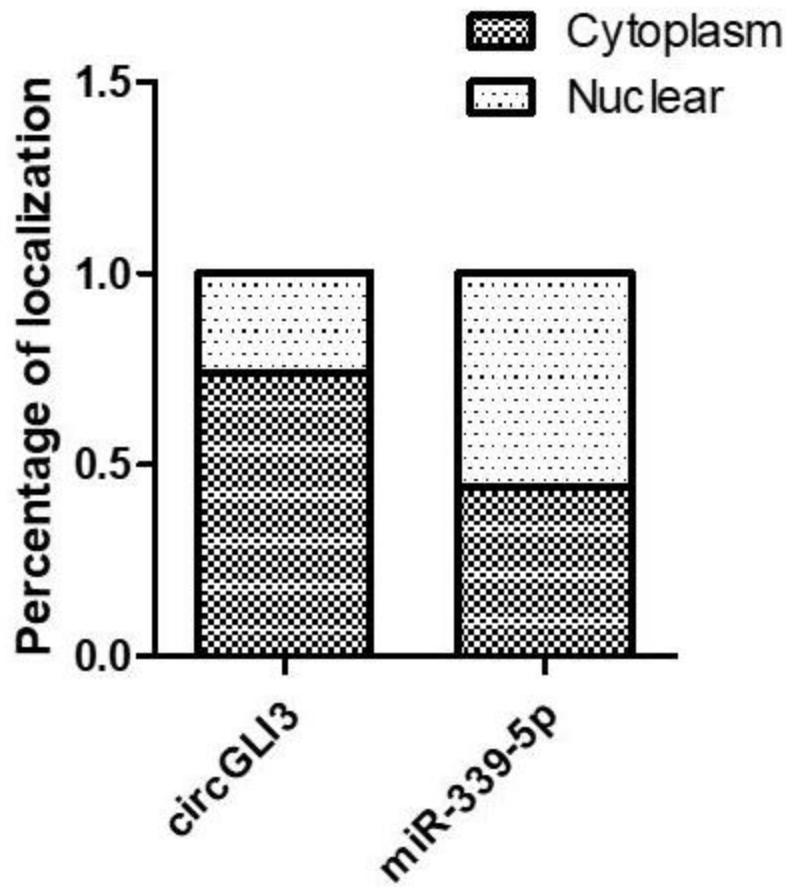

Supplement: f1 [file 1086206.f1.zip]
